1 ORIGINAL RESEARCH

2 Kuo et al

3 **Study on the effect of a triple cancer treatment of propolis,**  
4 **thermal cycling-hyperthermia, and low-intensity ultrasound**  
5 **on PANC-1 cells**

6

7 Yu-Yi Kuo<sup>1,2</sup>, Wei-Ting Chen<sup>1,2</sup>, Guan-Bo Lin<sup>1,2</sup>, Chueh-Hsuan Lu<sup>1,2</sup>, and  
8 Chih-Yu Chao<sup>1,2,3</sup>

9

10 <sup>1</sup> Department of Physics, Lab for Medical Physics & Biomedical Engineering, National  
11 Taiwan University, Taipei 10617, Taiwan

12 <sup>2</sup> Biomedical & Molecular Imaging Center, National Taiwan University College of  
13 Medicine, Taipei 10051, Taiwan

14 <sup>3</sup> Graduate Institute of Applied Physics, Biophysics Division, National Taiwan  
15 University, Taipei 10617, Taiwan

16

17 Correspondence: Chih-Yu Chao

18 Department of Physics, Lab for Medical Physics and Biomedical Engineering, National

19 Taiwan University, No 1, Sec 4, Roosevelt Rd, Taipei 10617, Taiwan, Republic of

20 China Tel +886-2-3366-9612

21 Fax +886-2-3366-5088

22 E-mail: [cychao@phys.ntu.edu.tw](mailto:cychao@phys.ntu.edu.tw) (CYC)

23

## 24 **Abstract**

25 **Background:** Pancreatic cancer is a deadly cancer around the world. To reduce side effects and  
26 enhance treatment efficacy, study on combination therapy for pancreatic cancer has gained  
27 much attention in recent years.

28 **Methods:** In this paper, we propose a novel triple treatment combining propolis and two  
29 physical stimuli—thermal cycling-hyperthermia (TC-HT) and low-intensity ultrasound (US) on  
30 a human pancreatic cancer cell line PANC-1. MTT assay was used to determine the viability of  
31 PANC-1 cells. Flow cytometry was used to detect apoptosis, mitochondrial membrane potential  
32 (MMP) loss, and intracellular reactive oxygen species (ROS) levels. Western blot analysis was  
33 further performed to measure protein expression and phosphorylation.

34 **Results:** The experiments found that, after the triple treatment, the cell viability of the PANC-1  
35 cells decreased to a level 80% less than the control, without affecting the normal pancreatic  
36 cells. Another result was excessive accumulation of ROS after the triple treatment, leading to  
37 the amplification of apoptotic pathway through the mitogen-activated protein kinase (MAPK)  
38 family and mitochondrial dysfunction. Moreover, the combination of TC-HT and US also  
39 promotes the anticancer effect of the heat-sensitive chemotherapy drug cisplatin on PANC-1  
40 cells.

41    **Conclusion:** This study, to the best of our knowledge, is the first attempt to combine TC-HT,  
42    US and a nature compound in cancer treatment. We demonstrate that physical stimuli could  
43    augment the therapeutical effect of anticancer agents. It is expected that optimized parameters  
44    for different agents and different types of cancer will expand the methodology on oncological  
45    therapy in a safe manner.

46    **Keywords:** combination treatment, synergistic effect, hyperthermia, pancreatic cancer, propolis

47

## 48 **Introduction**

49 Cancer is one of the most dreadful diseases and the second leading cause of death around  
50 the world. Among all kinds of cancers, pancreatic cancer is the most threatening one, due to its  
51 high death rate and low five-year survival rate.<sup>1</sup> Existing therapies for pancreatic cancer,  
52 including surgery, radiation, and chemotherapy, all involve major risks, such as tumor  
53 recurrence, refractory, and serious side effects,<sup>2</sup> as a result of which development of new  
54 therapies is of the utmost importance. A popular option is combination therapy, administering  
55 two or more anticancer agents to attain a synergistic effect.<sup>3</sup> However, the interaction between  
56 drugs may lead to unexpected competition and even harmful side effects,<sup>4,5</sup> jeopardizing  
57 patients' health, let alone improving therapeutic efficacy.

58 An emerging option in combination therapy is physical stimulus, whose effects on cellular  
59 physiology have been reported in several studies.<sup>6-8</sup> Our team has also looked into the feasibility  
60 of combining drug therapy and physical stimuli, such as heat,<sup>9</sup> electric field,<sup>10</sup> and magnetic  
61 field.<sup>11</sup> Ultrasound (US) is also a therapeutic tool with extensive application, such as developing  
62 internal images,<sup>12,13</sup> transporting liposomes to increase agent-delivery rate,<sup>14,15</sup> and ablating  
63 tumors from normal tissues.<sup>16,17</sup> The previous study also found US as a helpful method in  
64 inhibiting significantly the viability of PANC-1 cells.<sup>18</sup> However, US may also entail a number

65 of risks, such as harm to normal tissues around tumors due to overheating caused by  
66 high-intensity US.<sup>19,20</sup> In addition, liposomes may induce myocardial injury during transport by  
67 US.<sup>21,22</sup> In view of this, integrating low-intensity US<sup>23,24</sup> with a non-hazardous agent is  
68 important for expanding the use of US in therapy.

69 Accordingly, the study employed natural compounds from herbal medicines as anticancer  
70 agent. Among natural compounds with therapeutic potential, propolis has been found to be  
71 effective in inhibiting several cancer cell lines.<sup>25-27</sup> In our previous study, propolis was applied,  
72 along with thermal cycling-hyperthermia (TC-HT) as a physical stimulus,<sup>28</sup> in cancer treatment,  
73 but the effect still lags behind the in vitro efficacy of chemotherapy drugs.

74 In this paper, the study introduced low-intensity US as a secondary helper, on top of  
75 TC-HT, in order to further augment the anticancer effect of propolis. The novel triple treatment  
76 turned out to inhibit the viability of PANC-1 cells significantly, approaching the in vitro  
77 efficacy of chemotherapy drugs, without damaging the normal human pancreatic duct cells and  
78 skin cells. The study found that the low-intensity US in the triple treatment helped to manipulate  
79 the phosphorylation levels of mitogen-activated protein kinase (MAPK) family, thereby  
80 activating the intracellular apoptotic signalling. Moreover, it was found in the upstream that

81 intracellular reactive oxygen species (ROS) also increased greatly after the low-intensity US  
82 was applied in the triple treatment, thereby boosting the death rate of PANC-1 cells.

83

## 84 **Materials and Methods**

### 85 **Cell culture and propolis treatment**

86 The human pancreatic cancer cell line PANC-1 and the normal human embryonic skin cell line  
87 Detroit 551 were obtained from Bioresource Collection and Research Center (Hsinchu, Taiwan).  
88 Normal human pancreatic duct H6c7 cells were purchased from Kerafast, Inc. (Boston, MA,  
89 USA). PANC-1 and Detroit 551 cells were cultured respectively in DMEM and EMEM (both  
90 from Hyclone, South Logan, UT, USA) supplemented with 10% fetal bovine serum (FBS)  
91 (Hyclone) and 1% penicillin-streptomycin (Gibco Life Technologies, Grand Island, NY, USA).  
92 H6c7 cells were maintained in keratinocyte-serum free medium (Invitrogen, Life Technologies,  
93 Grand Island, NY, USA) supplemented with human recombinant epidermal growth factor,  
94 bovine pituitary extract (Invitrogen), and 1% penicillin-streptomycin (Gibco Life Technologies).  
95 All cells were maintained in a humidified 5% CO<sub>2</sub> incubator at 37 °C and subcultured by 0.05%  
96 trypsin–0.5 mM EDTA solution (Gibco Life Technologies). Once the confluences reached

97 suitable percentages, cells were plated in 96-well or 35-mm-diameter culture dishes (Thermo  
98 Fisher Scientific, Inc., Waltham, MA, USA) for in vitro experiments after 24 h. Propolis was  
99 purchased from Grandhealth™ (Grand Health Inc, Richmond, BC, Canada), and cisplatin was  
100 obtained from Sigma-Aldrich (St. Louis, MO, USA). All agents were mixed with culture  
101 medium to the desired concentration and were incubated with cells for 1h before treating  
102 physical stimuli.

103

#### 104 **Ultrasound exposure**

105 The US exposure system consisted of a function generator (SG382; Stanford Research Systems,  
106 Sunnyvale, CA, USA), a power amplifier (25a250a; Amplifier Research, Souderton, PA, USA),  
107 and a planar transducer (A104S-RM; Olympus NDT Inc., Waltham, MA, USA). Continuous  
108 pulses were produced using the function generator with the following parameters: -10 dBm  
109 amplitude, 1 ms pulse period, and 0.5 ms pulse width. The cell culture plate or dish was placed  
110 on the ceramic transducer (resonance frequency 2.25 MHz), which converted electrical signals  
111 into acoustic power (**Fig 1A**). To avoid undesirable thermal effects induced by US, the output



112 power of the spatial average intensity of the US exposure was adjusted to be  $0.3 \text{ W/cm}^2$

113 according to the previous studies.<sup>29,30</sup>

114

### 115 **Thermal cycling-hyperthermia (TC-HT) treatment**

116 A modified polymerase chain reaction (PCR) system was used to perform TC-HT (Figure 1B).

117 Thermal cycler (model 2720) was purchased from Applied Biosystems (Thermo Fisher

118 Scientific). The system was repeatedly brought to the desired high temperature state and

119 followed by a cooling stage to achieve a series of short period of heat exposure within the

120 desired time (Figure 1C). The experimental setup and administration of TC-HT (10-cycles) have

121 been previously described with optimum results.<sup>28</sup> The actual temperatures the cancer cells

122 sensed were measured by a needle thermocouple, ranging in  $45\sim 40.5 \text{ }^\circ\text{C}$  (Figure 1D).

123 Ultrasound exposure was applied either before or after the TC-HT treatment, for different

124 combination tests. During the TC-HT treatment ( $\sim 45 \text{ min}$ ), the control and propolis-treated

125 groups were under room temperature (RT) without a 5%  $\text{CO}_2$  environment. After the treatments,

126 cells were maintained in the cell culture incubator for the following experiments.

127

### 128 **MTT assay**

129 3-(4,5-dimethylthiazol-2-yl)-2,5-diphenyltetrazolium bromide (MTT) (Sigma-Aldrich) was  
130 dissolved in distilled water to prepare a 5 mg/ml stock solution. The treated PANC-1 cells were  
131 incubated for 4 h at 37 °C with a final MTT concentration 0.5 mg/ml in DMEM culture medium  
132 to assess the cell viabilities. The formazan crystals were dissolved by equal volume of the  
133 solubilizing buffer of 10% sodium dodecyl sulfate (SDS) (Bioshop Canada Inc., Burlington, ON,  
134 Canada) solution in 0.01 N hydrochloric acid (HCl) (Echo Chemical Co. Ltd., Miaoli, Taiwan)  
135 at 37 °C overnight. The absorbance of each well was detected by Multiskan GO microplate  
136 Spectrophotometer (Thermo Fisher Scientific), and the quantity of formazan was determined by  
137 the absorbance at 570 nm, with a background subtraction at 690 nm. The cell viabilities were  
138 expressed in percentage and the untreated control was set at 100%.

139

#### 140 **Treatment with ROS scavenger**

141 PANC-1 cells were seeded into 96-well or 35-mm-diameter culture dishes overnight. For ROS  
142 inhibition analysis, cells were pretreated with 5 mM N-acetyl-cysteine (NAC) (Sigma-Aldrich)  
143 in culture medium for 1 h and subsequently treated with propolis and/or physical stimuli.

144

145 **Apoptotic analysis by flow cytometry**

146 PANC-1 cells were collected 24 h after treatments and then rinsed twice with ice-cold  
147 phosphate buffered saline (PBS) (Hyclone). The apoptotic rates were analyzed by the Annexin  
148 V-FITC and propidium iodide (PI) double detection kit (BD Biosciences, San Jose, CA, USA),  
149 and the rinsed cells were resuspended in binding buffer containing Annexin V-FITC and PI and  
150 then incubated at RT for 15 min in the dark. Apoptotic signals were detected by FACSCanto II  
151 system (BD Biosciences).

152

153 **ROS and mitochondrial membrane potential (MMP) analyses by flow cytometry**

154 ROS was detected using the fluorescent dye dihydroethidium (DHE) (Sigma-Aldrich), and the  
155 loss of MMP was determined using the lipophilic cationic fluorescent dye  
156 3,3'-dihexyloxycarbocyanine iodide (DiOC<sub>6</sub>(3)) (Enzo Life Sciences, Inc., Plymouth Meeting,  
157 PA, USA). PANC-1 cells were harvested 24 h after treatments and rinsed with PBS before  
158 staining. Rinsed cells were resuspended and then incubated with 5 μM DHE or 20 nM DiOC<sub>6</sub>(3)  
159 in PBS at 37 °C for 30 min in the dark. The fluorescence signals were measured by FACSCanto

160 II system (BD Biosciences) with the PE channel (for DHE staining) or FL1 channel (for  
161 DiOC<sub>6</sub>(3) staining).

162

### 163 **Western blot analysis**

164 Protein expression levels of PANC-1 cells were quantified by western blot analysis. Cells were  
165 rinsed with PBS and then lysed in the lysis buffer (50 mM Tris-HCL, pH 7.4, 0.15 M NaCl,  
166 0.25% deoxycholic acid, 1% NP-40, 1% Triton X-100, 0.1 % SDS, 1 mM EDTA) (Millipore,  
167 Billerica, MA, USA), supplemented with active protease (Millipore) and phosphatase inhibitor  
168 cocktail (Cell signaling Technology, Danvers, MA, USA). After centrifugation, the supernatants  
169 were collected and the protein concentrations were quantified by Bradford protein assay  
170 (Bioshop, Inc.). Equal amount of proteins (20 µg) were resolved by 10% SDS-polyacrylamide  
171 gel electrophoresis (SDS-PAGE) and then transferred onto polyvinylidene fluoride (PVDF)  
172 membranes (Millipore). 5% skim milk powder or 5% bovine serum albumin in TBST (20 mM  
173 Tris-base, pH 7.6, 0.15 M NaCl, 0.1% Tween 20) was used to block nonspecific antibody  
174 binding sites for 1 h at RT. Afterwards, the blocked membranes were probed with specific  
175 primary antibodies against phosphorylated extracellular signal-regulated kinases (p-ERK),

176 phosphorylated c-Jun N-terminal kinase (p-JNK), poly (ADP-ribose) polymerase (PARP) (Cell  
177 signaling), phosphorylated p38 MAPK (p-p38), and glyceraldehyde-3-phosphate dehydrogenase  
178 (GAPDH) (Gentex, Irvine, CA, USA) at 4 °C overnight. The membranes were rinsed with  
179 TBST buffer three times and then incubated with horseradish peroxidase-conjugated goat  
180 anti-rabbit secondary antibodies (Jackson ImmunoResearch Laboratories, West Grove, PA,  
181 USA) in a blocking solution at RT for 1 h. Immunoreactivity signal was amplified by an  
182 enhanced chemiluminescence (ECL) substrate (Advansta, San Jose, CA, USA) and detected by  
183 an imaging system Amersham Imager 600 (GE Healthcare Life Sciences). GAPDH was used as  
184 the loading control to normalize the relative folds of targeting proteins.

185

## 186 **Statistical analysis**

187 Experiments were repeated three times for validation, and statistical analyses were performed  
188 using one-way analysis of variance (ANOVA) by OriginPro 2015 software (OriginLab). Results  
189 were expressed as the mean  $\pm$  standard deviation, and were considered to be statistically  
190 significant when *p*-values were less than 0.05.

191

## 192 **Results**

### 193 **Triple treatment greatly inhibits the viability of PANC-1 cells**

194 The cell viability of PANC-1 cells versus the propolis concentration was performed in a  
195 gradient manner. When the propolis was less than 0.5%, as shown in Figure 2A, there was no  
196 notable inhibition effect on MTT results. However, when it exceeded 0.5%, the cell viability  
197 dropped significantly. Therefore, a moderate propolis concentration 0.3% was chosen for the  
198 following experiments. Next, the physical stimuli of TC-HT and low-intensity US were  
199 introduced to affect the viability of PANC-1 cells. In our study, 10-cycles TC-HT and 2.25  
200 MHz US with intensity  $0.3\text{W}/\text{cm}^2$  and duration 30 minutes were chosen to avoid the  
201 thermotoxicity on PANC-1 cells. As shown in Figure 2B, we found that the combination of  
202 TC-HT and US was also innocent to PANC-1 cells, but when 0.3% propolis was involved in the  
203 triple treatment, the viability of PANC-1 cells was greatly inhibited. It was also noted that the  
204 implementation order of TC-HT and US in triple treatment was influential. When TC-HT was  
205 performed prior to US (TC-HT + US) in the presence of 0.3% propolis, US helped to further  
206 suppress the cell viability of PANC-1 cells significantly down to 17.1%, cutting more than 80%  
207 of the viability of the untreated control and thus approaching the in vitro efficacy of

208 chemotherapy drugs. In comparison, the treatment that US was performed prior to TC-HT (US  
209 + TC-HT) showed a less inhibition effect (43.1% viability), and hence we adopted the  
210 implementation order TC-HT + US as the protocol of the triple treatment in the subsequent  
211 experiments. Furthermore, in all double treatments, only 0.3% propolis + TC-HT showed  
212 notable inhibition effect (48.9% viability) on PANC-1 cells, which was consistent with our  
213 previous results.<sup>28</sup> However, 0.3% propolis + US performed a relatively poor inhibition effect  
214 (65.4% viability) on PANC-1 cells, and as a result it was also not included in the following  
215 experiments. Figure 2C showed the light microscope images of PANC-1 cells 24 h after each  
216 treatment, and the cell morphologies demonstrated an evident inhibition effect on PANC-1 cells  
217 after the triple treatment. Moreover, normal cells such as the human skin cells Detroit 551  
218 (Figure 2D) and human pancreatic duct cells H6c7 (Figure 2E) were not significantly affected  
219 by the triple treatment as well as all the other treatments. The result indicates that the triple  
220 treatment could have a good selective effect on carcinoma cells and normal cells, which makes  
221 it safer and more feasible in anticancer treatment.

222

223 **Triple treatment increases intracellular ROS levels synergistically**

224 Intracellular ROS is an important regulator of cell death. It has been reported that heat and  
225 low-intensity US could elevate the intracellular ROS level.<sup>31,32</sup> We further investigated whether  
226 ROS was increased in response to the triple treatment, so the DHE was used in this experiment  
227 to determine the level of superoxide radical anion ( $O_2^{\cdot -}$ ) in PANC-1 cells after each treatment.  
228 As shown in Figure 3A-B, it was found that propolis hardly changed the fluorescence signals.  
229 Although propolis + TC-HT significantly deformed the fluorescence intensity distribution in an  
230 enhanced manner (1.6-fold to control), it did not significantly differ from the enhancement  
231 induced by TC-HT alone. In addition, US elevated ROS levels as well, though not as many as  
232 TC-HT. Noticeably, the triple treatment showed a significant accumulation of the intracellular  
233 ROS (up to 2.1-fold of the control group), which was also significantly higher than the TC-HT  
234 + 0.3% propolis treatment. The result suggested that, in the triple treatment, US helped to  
235 further boost up the generation of ROS in PANC-1 cells, and could result in enhanced cell death  
236 rate after the treatment.

237

238 **Triple treatment increases mitochondrial apoptosis in PANC-1 cells**



239 It has been known that the enhanced intracellular ROS levels were positively correlated to  
240 mitochondrial apoptosis.<sup>33</sup> In our work, the apoptotic rates of PANC-1 cells after various  
241 treatments were analyzed by the flow cytometry with the fluorescence dye Annexin V and PI  
242 (Figure 4A-B). With the aid of US, the triple treatment further caused 55.3% apoptotic rate,  
243 which was significantly higher than the 23.5% apoptotic rate caused by the double treatment of  
244 propolis and TC-HT. The cell apoptosis results observed here were highly consistent with the  
245 results of the accumulated ROS levels in PANC-1 cells after the same treatment, as described in  
246 Figure 3. Furthermore, the mitochondrial membrane potential (MMP) was assessed using  
247 DiOC<sub>6</sub>(3) fluorescence staining by flow cytometric analysis. As shown in Figure 4C-D, the ratio  
248 of the cells exhibiting MMP loss was significantly promoted to 23.3% after the double  
249 treatment of propolis + TC-HT, and it was further elevated significantly to 34.7% by employing  
250 the triple treatment. These results showed that adopting US in the triple treatment could  
251 decrease MMP level, and hence caused more mitochondrial dysfunction. The decreased MMP  
252 level was an indicator of mitochondrial apoptosis, and since the results of apoptosis assay  
253 (Figure 4A-B) and MMP assay (Figure 4C-D) were quite similar, we believe that the  
254 mitochondrial dysfunction was implicated in the apoptosis of PANC-1 cells via the triple  
255 treatment.

256

257 **The apoptosis induced by triple treatment is regulated through MAPK pathway**

258 The activation of apoptotic signalling was examined by western blot analysis. As shown in  
259 Figure 5A, we found that the PARP cleavage was significantly increased (2.9-fold of control)  
260 after propolis + TC-HT treatment on PANC-1 cells. Noticeably, the PARP cleavage was further  
261 promoted significantly to 6.2-fold of control by US in the triple treatment (Figure 5A). Together  
262 with the previous flow cytometry results of apoptosis and MMP, it was pointed out that propolis  
263 + TC-HT could activate the mitochondrial apoptosis signalling in PANC-1 cells, and US in the  
264 triple treatment could further help this cascade to realize a near-chemotherapy level treatment in  
265 vitro.

266 Moreover, it was known that the PARP cleavage could be modulated by MMP level, and  
267 mitochondrial dysfunction could also be regulated by the excessive intracellular ROS via  
268 MAPK family.<sup>34</sup> In MAPK family, the p-ERK level represented the activation of cell survival,<sup>35</sup>  
269 while the p-JNK and p-p38 levels were the indicator of cell death.<sup>36,37</sup> In this study, it was found  
270 that the p-ERK level was suppressed by propolis + TC-HT treatment (0.30-fold), and was  
271 further down-regulated when US was introduced in the triple treatment (0.15-fold) (Figure 5B).

272 In addition, the p-JNK and p-p38 levels both exhibited a reverse performance, which were  
273 promoted the most in the triple treatment (8.7-fold & 9.2-fold, respectively) (Figure 5C-D).  
274 These results were consistent with the results of ROS and MMP assessments by flow cytometry.  
275 Therefore, we speculated that the excess intracellular ROS induced by the triple treatment  
276 regulated the activation of the MAPK family and thus caused mitochondrial dysfunction and the  
277 cascade of apoptosis.

278

### 279 **ROS scavenger attenuates the apoptosis induced by triple treatment**

280 To further confirm that the cell death after the triple treatment was regulated by the generation  
281 of intracellular ROS, the ROS scavenger NAC was applied in the experiment.<sup>38</sup> 5 mM NAC was  
282 incubated with PANC-1 cells 1 h prior to the triple treatment. As shown in Figure 6A, the  
283 inhibitory effect of the triple treatment was restored by NAC, and NAC itself did not affect the  
284 viability of PANC-1 cells. Similar results were also observed in the activation of apoptotic  
285 pathway, as shown in Figure 6B. NAC alone did not affect PARP cleavage, but it significantly  
286 down-regulated the triple treatment-promoted PARP cleavage (Figure 6B). Therefore, the

287 results supported our speculation that the triple treatment could induce mitochondrial apoptosis  
288 of PANC-1 cells via the excessive increment of intracellular ROS.

289

290 **Triple treatment can be applied with chemotherapy drug as a novel anticancer**  
291 **treatment**

292 In this study, we have shown that the method TC-HT followed by mild US exposure could  
293 further amplify the anticancer effect of propolis. But, the question is whether the TC-HT + US  
294 method can be expanded to the existing chemotherapy drugs. Cisplatin, for instance, was a  
295 commonly used clinical chemotherapy drug for several kinds of cancers such as lung, ovarian,  
296 breast, and brain cancer.<sup>39</sup> Besides, it has also been reported that cisplatin was sensitive to  
297 heat.<sup>40</sup> However, the conventional therapeutic dosage of cisplatin could cause severe side effects  
298 to the patients,<sup>41,42</sup> and therefore it was important to develop a new method to reduce the  
299 effective dose of cisplatin. As a result, we applied the method of TC-HT + US with cisplatin on  
300 the PANC-1 cells to investigate the potential of this triple treatment method. A relatively low  
301 dose of 1  $\mu$ M cisplatin and short incubation time 24 h was chosen for the MTT assay  
302 independently or in combination with the physical stimulations.<sup>43,44</sup> After the treatment, the

303 viability of PANC-1 cells was just slightly inhibited by 7.5% by individual cisplatin, and the  
304 double treatment of cisplatin + TC-HT also did not alter the viability of PANC-1 cells. The  
305 triple treatment, however, promoted the inhibitory effect significantly up to 48.2% (Figure 7).  
306 Compared to the conventional results of cisplatin, our method could not only reduce the  
307 effective dose but also boost up the anticancer effect of cisplatin. Therefore, the method of  
308 physical stimuli in the study should hold great potential to apply onto other heat sensitive  
309 chemotherapy drugs or anticancer agents to achieve a better anticancer effect.

310

## 311 **Discussion**

312 Combination treatment augments the anticancer effect of individual agents by activating  
313 multiple pathways, thereby lowering the necessary dosage of the agents to a level harmless to  
314 normal cells and human health. However, research on combination anticancer agents is costly  
315 and time-consuming.<sup>45</sup> Moreover, unpredictable molecular interactions may be detrimental to  
316 patients' health.<sup>5</sup> Therefore, the application of physical stimuli has been considered as a  
317 potential candidate for combinative anticancer treatments in combating cancer. Following  
318 several combination treatments of physical stimuli and herbal compounds proposed by our team  
319 previously,<sup>46</sup> the study put forth the combination treatment of propolis, TC-HT, and

320 low-intensity US, proving that it can inhibit pancreatic cancer cell line PANC-1 at a level close  
321 to the in vitro efficacy of chemotherapy drugs.

322 In cancer cells, intracellular ROS levels have been known to be the main source of the  
323 oxidative stress,<sup>47</sup> a key factor for cell viability.<sup>48</sup> Elevated ROS level has been shown to be able  
324 to activate some signalling pathways associated with cell proliferation, apoptosis, and cell cycle  
325 progression.<sup>49</sup> Besides, heat treatment and low-intensity US both can increase the intracellular  
326 ROS levels.<sup>31,32</sup> In this work, the study shows that TC-HT significantly augments the  
327 intracellular ROS levels of PANC-1 cells (Figure 3A-B), at an extent higher than the individual  
328 effects of propolis and low-intensity US. It was found that the combination of propolis and  
329 TC-HT did not further elevate the levels in PANC-1 cells. Nevertheless, after the low-intensity  
330 US was administered, the triple treatment showed a great improvement effect, doubling the  
331 intracellular ROS levels of PANC-1 cells. It has been known that excessive intracellular ROS  
332 level could activate the apoptotic pathway cascade, increasing the apoptosis in the carcinoma  
333 cells.<sup>33</sup> Our study demonstrated that the apoptotic rate of PANC-1 cells was elevated along with  
334 the increase of the intracellular ROS levels. The result showed that the triple treatment induced  
335 the highest apoptotic rate, compared with other approaches, suggesting its ability to regulate the  
336 death of PANC-1 cells via excessive intracellular ROS accumulation. To demonstrate the

337 crucial role of the intracellular ROS levels, NAC was employed in the following experiments on  
338 the triple treatment. While independent NAC pretreatment did not affect the viabilities of  
339 PANC-1 cells (Figure 6A), it protected the cells from cytotoxicity in the triple treatment. Hence,  
340 ROS elevation played a key role in the anticancer effect in the triple treatment.

341 The initiation of apoptosis, a common cell death mechanism, is closely related to the  
342 function of mitochondria, which is the chemical-energy source of cells and critical for the  
343 viability of cells.<sup>50</sup> It was reported that US could induce mitochondrial dysfunction,<sup>51</sup> and the  
344 dysfunction could induce a series of biochemical cascade of apoptosis, thereby blocking cell  
345 proliferation.<sup>52</sup> Meanwhile, the activated members of the MAPK family, such as ERK, JNK, and  
346 p38 were deemed to be capable of regulating the dysfunction of mitochondria, and the elevated  
347 ROS level was shown to be conducive to the activation of p38 and JNK but down-regulate the  
348 activation of ERK.<sup>53</sup> The results suggest that excessive ROS further induced by US could cause  
349 greater mitochondrial apoptotic rate via additionally activating the MAPK family members. In  
350 this work, our study showed that adopting US in the triple treatment raised greater apoptotic rate  
351 of PANC-1 cells (Figure 4A-B), while decreasing the MMP level lower, which led to more  
352 severe dysfunction of mitochondria than the double treatment of propolis and TC-HT (Figure  
353 4C-D). Furthermore, the mild US in the triple treatment further helped to increase the

354 phosphorylated levels of p38 and JNK significantly, while inhibiting the phosphorylation of  
355 ERK (Figure 5), underscoring its ability to manipulate the function of mitochondria via the  
356 ROS-activated MAPK family proteins.

357 The injured mitochondria would release cytochrome-c into the cytoplasm,<sup>54</sup> cleaving  
358 caspase 9 and thus activating caspase 3 in the downstream,<sup>55</sup> which entered further the nucleus  
359 and cleaved PARP. Then PARP would lose its enzyme activity, initiating apoptosis  
360 irreversibly.<sup>56</sup> In addition, it was reported that US could induce mitochondrial apoptosis in  
361 cancer cells.<sup>51,57</sup> The study demonstrated that the triple treatment could induce mitochondrial  
362 dysfunction via regulating the phosphorylation level of the members of MAPK family. In  
363 addition, the triple treatment also increased PARP cleavage significantly, compared with the  
364 combination treatment of propolis and TC-HT (Figure 5A). Furthermore, as shown in Figure 6B,  
365 it was found that the triple treatment-promoted PARP cleavage was significantly suppressed by  
366 NAC, which indicates that increased ROS level was the key regulator for the apoptotic effect of  
367 the triple treatment.

368 The triple treatment in the study included two physical stimuli, TC-HT and US, which  
369 could be integrated for simultaneous implementation via the high-intensity focused ultrasound  
370 (HIFU). Being able to raise temperature in the exposed region for energy transfer,<sup>19,20</sup> HIFU has



371 been applied for tumor ablation for over a decade.<sup>16,58</sup> The temperature increase could be  
372 electrically controlled and directed to the targeted region.<sup>59</sup> Therefore, with the help of HIFU,  
373 the triple treatment could be applied clinically. To augment the effect, cisplatin, a common  
374 thermal sensitive chemotherapy drug, was incorporated as a substitute for propolis into the triple  
375 treatment. It was shown that the inhibited viability of PANC-1 cells by cisplatin was further  
376 suppressed with a large extent when both of TC-HT and US were introduced into the treatment  
377 (Figure 7). The dosage of cisplatin can be reduced to a lower concentration, without  
378 compromising the anticancer effect. As a result, the triple treatment has the potential  
379 supplementing the administration of drugs, not only augmenting the effect but also reducing the  
380 dosage of the latter.

381

## 382 **Conclusion**

383 In summary, this study proposed for the first time an effective triple cancer treatment  
384 combining propolis, TC-HT, and low-intensity US, which could significantly suppress the  
385 growth of PANC-1 cells via an ROS-modulated mitochondrial apoptosis, with a performance  
386 comparable to chemotherapy. The study also showed that the triple treatment could induce  
387 mitochondrial dysfunction via the regulation of MAPK family, resulting in apoptosis via the

388 up-regulated PARP cleavage. It also demonstrated that the ROS level plays a key role in the  
389 performance of the triple treatment. In addition, chemotherapy drugs, such as cisplatin, can be  
390 incorporated into the treatment as substitute for propolis. The triple treatment incorporating  
391 cisplatin also exhibited a much higher effect in inhibiting cancer cell growth than the cisplatin  
392 alone, promising to increase the performance and safety of the existing cancer therapy. Overall,  
393 the study proposed employment of physical stimuli, as a promising option in cancer therapy.

394

## 395 **Acknowledgments**

396 The authors would like to acknowledge the service provided by Technology  
397 Commons in College of Life Science, National Taiwan University for use of flow  
398 cytometry system. This work was supported by grants from Ministry of Science and  
399 Technology (MOST 110-2112-M-002-004, MOST 109-2112-M-002-004, and MOST  
400 108-2112-M-002-016 to CYC) and Ministry of Education (MOE 106R880708 to CYC)  
401 of the Republic of China. The funders had no role in study design, data collection and  
402 analysis, decision to publish, or preparation of the manuscript.

403

## 404 **Disclosure**

405           The authors have declared that no competing interests exist.

406

## 407   **References**

- 408           1. Siegel RL, Miller KD, Jemal A. Cancer statistics, 2019. *CA Cancer J Clin.* 2019;69(1):  
409           7-34.
- 410           2. Lee JC, Ahn S, Cho IK, Lee J, Kim J, Hwang JH. Management of recurrent pancreatic  
411           cancer after surgical resection: a protocol for systematic review, evidence mapping and  
412           meta-analysis. *BMJ Open.* 2018;8(4):e017249.
- 413           3. Yap TA, Omlin A, de Bono JS. Development of therapeutic combinations targeting  
414           major cancer signaling pathways. *J Clin Oncol.* 2013;31(12):1592-1605.
- 415           4. Terrault NA. Benefits and risks of combination therapy for hepatitis B. *Hepatology.*  
416           2009;49 (5 Suppl):S122-S128.
- 417           5. Lee JJ, Kong M, Ayers GD, Lotan R. Interaction index and different methods for  
418           determining drug interaction in combination therapy. *J Biopharm Stat.*  
419           2007;17(3):461-480.

- 420        6. Soares PI, Ferreira IM, Igreja RA, Novo CM, Borges JP. Application of hyperthermia  
421            for cancer treatment: recent patents review. *Recent Pat Anticancer Drug Discov.*  
422            2012;7(1):64-73.
- 423        7. Davies AM, Weinberg U, Palti Y. Tumor treating fields: a new frontier in cancer  
424            therapy. *Ann N Y Acad Sci.* 2013;1291(1):86-95.
- 425        8. Wood AKW, Sehgal CM. A review of low-intensity ultrasound for cancer therapy.  
426            *Ultrasound Med Biol.* 2015;41(4):905-928.
- 427        9. Lu CH, Chen WT, Hsieh CH, Kuo YY, Chao CY. Thermal cycling-hyperthermia in  
428            combination with polyphenols, epigallocatechin gallate and chlorogenic acid, exerts  
429            synergistic anticancer effect against human pancreatic cancer PANC-1 cells. *PLoS One.*  
430            2019;14(5):e0217676.
- 431        10. Lu CH, Lin SH, Hsieh CH, Chen WT, Chao CY. Enhanced anticancer effects of  
432            low-dose curcumin with non-invasive pulsed electric field on PANC-1 cells. *Oncotargets Ther.* 2018;11:4723-4732.
- 433            *Targets Ther.* 2018;11:4723-4732.
- 434        11. Chen WT, Lin GB, Lin SH, et al. Static magnetic field enhances the anticancer efficacy  
435            of capsaicin on HepG2 cells via capsaicin receptor TRPV1. *PLoS One.*  
436            2018;13(1):e0191078.

- 437 12. O'Keeffe D, Mamtora H. Ultrasound in clinical orthopaedics. *J Bone Joint Surg.*  
438 1992;74(4):488-494.
- 439 13. Bendick PJ, Brown OW, Hernandez D, Glover JL, Bove PG. Three-dimensional  
440 vascular imaging using Doppler ultrasound. *Am J Surg.* 1998;176(2):183-187.
- 441 14. Ferrara K, Pollard R, Borden M. Ultrasound microbubble contrast agents: fundamentals  
442 and application to gene and drug delivery. *Annu Rev Biomed Eng.* 2007;9(1):415-447.
- 443 15. Wang TY, Wilson KE, Machtaler S, Willmann JK. Ultrasound and microbubble guided  
444 drug delivery: mechanistic understanding and clinical implications. *Curr Pharm*  
445 *Biotechnol.* 2013;14(8):743-752.
- 446 16. Zhou YF. High intensity focused ultrasound in clinical tumor ablation. *World J Clin*  
447 *Oncol.* 2011;2(1):8-27.
- 448 17. Lang BH, Wu ALH. High intensity focused ultrasound (HIFU) ablation of benign  
449 thyroid nodules – a systematic review. *J Ther Ultrasound.* 2017;5(1):11.
- 450 18. Hsieh CH, Lu CH, Kuo YY, Chen WT, Chao CY. Studies on the non-invasive  
451 anticancer remedy of the triple combination of epigallocatechin gallate, pulsed electric  
452 field, and ultrasound. *PLoS One.* 2018;13(8):e0201920.

- 453           19. van den Bijgaart RJ, Eikelenboom DC, Hoogenboom M, Fütterer JJ, den Brok MH,  
454           Adema GJ. Thermal and mechanical high-intensity focused ultrasound: perspectives on  
455           tumor ablation, immune effects and combination strategies. *Cancer Immunol*  
456           *Immunother.* 2017;66(2):247-258.
- 457           20. Dubinsky TJ, Cuevas C, Dighe MK, Kolokythas O, Hwang JH. High-intensity focused  
458           ultrasound: current potential and oncologic applications. *AJR Am J Roentgenol.*  
459           2008;190(1):191-199.
- 460           21. Zhang B, Zhou H, Cheng Q, Lei L, Hu B. Low-frequency low energy ultrasound  
461           combined with microbubbles induces distinct apoptosis of A7r5 cells. *Mol Med Rep.*  
462           2014;10(6):3282-3288.
- 463           22. Vancraeynest D, Havaux X, Pasquet A, et al. Myocardial injury induced by  
464           ultrasound-targeted microbubble destruction: evidence for the contribution of  
465           myocardial ischemia. *Ultrasound Med Biol.* 2009;35(4):672-679.
- 466           23. Johns LD. Nonthermal effects of therapeutic ultrasound: the frequency resonance  
467           hypothesis. *J Athl Train.* 2002;37(3):293-299.
- 468           24. Bazou D, Maimon N, Munn LL, Gonzalez I. Effects of low intensity continuous  
469           ultrasound (LICU) on mouse pancreatic tumor explants. *Appl Sci.* 2017;7(12):1275.

- 470 25. Taira N, Nguyen BC, Be Tu PT, Tawata S. Effect of Okinawa propolis on PAK1  
471 activity, caenorhabditis elegans longevity, melanogenesis, and growth of cancer cells. *J*  
472 *Agric Food Chem.* 2016;64(27):5484-5489.
- 473 26. Li H, Kapur A, Yang JX, et al. Antiproliferation of human prostate cancer cells by  
474 ethanolic extracts of Brazilian propolis and its botanical origin. *Int J Oncol.*  
475 2007;31(3):601-606.
- 476 27. Xuan H, Li Zhen, Yan H, et al. Antitumor activity of Chinese propolis in human breast  
477 cancer MCF-7 and MDA-MB-231 cells. *Evid Based Complement Alternat Med.*  
478 2014;2014:280120.
- 479 28. Chen WT, Sun YK, Lu CH, Chao CY. Thermal cycling as a novel thermal therapy to  
480 synergistically enhance the anticancer effect of propolis on PANC-1 cells. *Int J Oncol.*  
481 2019;55(3):617-628.
- 482 29. Love L, Kremkau F. Intracellular temperature distribution produced by ultrasound. *J*  
483 *Acoust Soc Am.*1980;67(3):1045-1050.
- 484 30. Nahirnyak V, Mast TD, Holland CK. Ultrasound-induced thermal elevation in clotted  
485 blood and cranial bone. *Ultrasound Med Biol.* 2007;33(8):1285-1295.

- 486        31. Hou CH, Lin FL, Hou SM, Liu JF. Hyperthermia induces apoptosis through  
487        endoplasmic reticulum and reactive oxygen species in human osteosarcoma cells. *Int J*  
488        *Mol Sci*. 2014;15(10):17380-17395.
- 489        32. Xia C, Zeng H, Zheng Y. Low-intensity ultrasound enhances the antitumor effects of  
490        doxorubicin on hepatocellular carcinoma cells through the ROS-miR-21-PTEN axis.  
491        *Mol Med Rep*. 2020;21(3):989-998.
- 492        33. Redza-Dutordoir M, Averill-Bates DA. Activation of apoptosis signalling pathways by  
493        reactive oxygen species. *Biochim Biophys Acta*. 2016;1863(12):2977-2992.
- 494        34. Zang YQ, Feng YY, Luo YH, et al. Quinalizarin induces ROS-mediated apoptosis via  
495        the MAPK, STAT3 and NF- $\kappa$ B signaling pathways in human breast cancer cells. *Mol*  
496        *Med Rep*. 2019;20(5):4576-4586.
- 497        35. Meng J, Fang B, Liao Y, Chresta CM, Smith PD, Roth JA. Apoptosis induction by  
498        MEK inhibition in human lung cancer cells is mediated by Bim. *PLoS One*.  
499        2010;5(9):e13026.
- 500        36. Chiyo T, Fujita K, Iwama H, et al. Galectin-9 induces mitochondria-mediated apoptosis  
501        of esophageal cancer in vitro and in vivo in a xenograft mouse model. *Int J Mol Sci*.  
502        2019;20(11):2634.



- 503           37. Wu YJ, Su TR, Dai GF, Su JH, Liu CI. Flaccidoxide-13-acetate-induced apoptosis in  
504           human bladder cancer cells is through activation of p38/JNK, mitochondrial  
505           dysfunction, and endoplasmic reticulum stress regulated pathway. *Mar Drugs*.  
506           2019;17(5):287.
- 507           38. Aruoma OI, Halliwell B, Hoey BM, Butler J. The antioxidant action of  
508           N-acetylcysteine: its reaction with hydrogen peroxide, hydroxyl radical, superoxide,  
509           and hypochlorous acid. *Free Radic Biol Med*. 1989;6(6):593-597.
- 510           39. Dasari S, Tchounwou PB. Cisplatin in cancer therapy: molecular mechanisms of action.  
511           *Eur J Pharmacol*. 2014;740:364-378.
- 512           40. Behrouzki Z, Joveini Z, Keshavarzi B, Eyvazzadeh N, Aghdam RZ. Hyperthermia:  
513           how can it be used? *Oman Med J*. 2016;31(2):89-97.
- 514           41. Florea AM, Büsselberg D. Cisplatin as an anti-tumor drug: cellular mechanisms of  
515           activity, drug resistance and induced side effects. *Cancers*. 2011;3(1):1351-1371.
- 516           42. Ghosh S. Cisplatin: the first metal based anticancer drug. *Bioorg Chem*.  
517           2019;88:102925.

- 518 43. Cregan IL, Dharmarajan AM, Fox SA. Mechanisms of cisplatin-induced cell death in  
519 malignant mesothelioma cells: Role of inhibitor of apoptosis proteins (IAPs) and  
520 caspases. *Int J Oncol.* 2013;42(2):444-452.
- 521 44. Beer M, Kuppala N, Stefanini M, et al. A novel microfluidic 3D platform for culturing  
522 pancreatic ductal adenocarcinoma cells: comparison with in vitro cultures and in vivo  
523 xenografts. *Sci Rep.* 2017;7(1):1325.
- 524 45. Huang H, Zhang P, Qu XA, Sanseau P, Yang L. Systematic prediction of drug  
525 combinations based on clinical side-effects. *Sci Rep.* 2014;4(1):7160.
- 526 46. Lu CH, Kuo YY, Lin GB, Chen WT, Chao CY. Application of non-invasive  
527 low-intensity pulsed electric field with thermal cycling-hyperthermia for synergistically  
528 enhanced anticancer effect of chlorogenic acid on PANC-1 cells. *PLoS ONE.*  
529 2020;15(1):e0222126.
- 530 47. Liou GY, Storz P. Reactive oxygen species in cancer. *Free Radic Res.*  
531 2010;44(5):479-496.
- 532 48. Kannan K, Jain SK. Oxidative stress and apoptosis. *Pathophysiology.*  
533 2000;7(3):153-163.

- 534 49. Aggarwal V, Tuli HS, Varol A, Thakral F, Yerer MB, Sak K. Role of reactive oxygen  
535 species in cancer progression: molecular mechanisms and recent advancements.  
536 *Biomolecules*. 2019;9(11):735.
- 537 50. Osellame LD, Blacker TS, Duchen MR. Cellular and molecular mechanisms of  
538 mitochondrial function. *Best Pract Res Clin Endocrinol Metab*. 2012;26(6):711-723.
- 539 51. Wang P, Leung AW, Xu C. Low-intensity ultrasound-induced cellular destruction and  
540 autophagy of nasopharyngeal carcinoma cells. *Exp Ther Med*. 2011;2(5):849-852.
- 541 52. Elmore S. Apoptosis: a review of programmed cell death. *Toxicol Pathol*.  
542 2007;35(4):495-516.
- 543 53. Yuan L, Wang J, Xiao H, Wu W, Wang Y, Liu X. MAPK signaling pathways regulate  
544 mitochondrial-mediated apoptosis induced by isoorientin in human hepatoblastoma  
545 cancer cells. *Food Chem Toxicol*. 2013;53:62-68.
- 546 54. Garrido C, Galluzzi L, Brunet M, Puig PE, Didelot C, Kroemer G. Mechanisms of  
547 cytochrome c release from mitochondria. *Cell Death Differ*. 2006;13(9):1423-1433.
- 548 55. Brentnall M, Rodriguez-Menocal L, De Guevara RL, Cepero E, Boise LH. Caspase-9,  
549 caspase-3 and caspase-7 have distinct roles during intrinsic apoptosis. *BMC Cell Biol*.  
550 2013;14(1):32.

551 56. Jimenez F, Aiba Masago S, Al Hashimi I, et al. Activated caspase 3 and cleaved  
552 poly(ADP-ribose)polymerase in salivary epithelium suggest a pathogenetic mechanism  
553 for Sjögren's syndrome. *Rheumatology*. 2002;41(3):338-342.

554 57. Feng Y, Tian Z, Wan M. Bioeffects of low-intensity ultrasound in vitro: apoptosis,  
555 protein profile alteration, and potential molecular mechanism. *J Ultrasound Med*.  
556 2010;29(6):963-974.

557 58. Duc NM, Keserci B. Emerging clinical applications of high-intensity focused  
558 ultrasound. *Diagn Interv Radiol*. 2019;25(5):398-409.

559 59. Park S, Pham NT, Huynh HT, Kang HW. Development of temperature  
560 controller-integrated portable HIFU driver for thermal coagulation. *Biomed Eng Online*.  
561 2019;18(1):77.

562

563 **Figure 1** Experimental setups for the triple treatment.

564 **Notes:** 35-mm culture dishes were placed on (A) a ceramic transducer and (B) a modified PCR  
565 machine for the exposures of US and TC-HT, respectively. (C) The schematic representation of  
566 the TC-HT temperature settings. (D) Cell temperature detected by a needle thermocouple when

567 TC-HT was implemented. (E) Experimental schedule of the triple treatment with different  
568 exposing order of US and TC-HT.

569 **Abbreviations:** US, ultrasound; TC-HT, thermal cycling-hyperthermia.

570

571 **Figure 2** Viability inhibition effects of propolis on PANC-1, Detroit 551, and H6c7 cells.

572 **Notes:** MTT assay was conducted to determine the viabilities of PANC-1 cells after the  
573 treatment of (A) different propolis concentrations and (B) different combinations of physical  
574 stimulations. (C) Representative light microscope images of PANC-1 cells after each treatment,  
575 scale bar = 100  $\mu$ m. The viabilities of (D) normal human skin cells Detroit 551 and (E) normal  
576 human pancreatic duct cells H6c7 were measured 24 h after each treatment. Data were  
577 presented as the mean  $\pm$  standard deviation in triplicate (\*\*P<0.001). Ctrl, Control group with  
578 no treatment; Propolis, Propolis group with 0.3% (v/v) propolis; TC-HT, TC-HT group with 10  
579 cycles TC-HT (setting: 46 °C 3 min – 37 °C 30 s); Propolis + TC-HT, Propolis + TC-HT group  
580 with 0.3% (v/v) propolis and 10 cycles TC-HT (setting: 46 °C 3 min – 37 °C 30 s), sequentially;  
581 US, US group with 2.25 MHz US (0.3 W/cm<sup>2</sup>) for 30 min; Triple, Triple group with 0.3% (v/v)  
582 propolis, 10 cycles TC-HT (setting: 46 °C 3 min – 37 °C 30 s), and 2.25 MHz US (0.3 W/cm<sup>2</sup>)  
583 for 30 min, sequentially.

584 **Abbreviations:** US, ultrasound; TC-HT, thermal cycling-hyperthermia.

585

586 **Figure 3** The triple treatment raised the generation of intracellular ROS.

587 **Notes:** (A) Intracellular superoxide radical anion ( $O_2^{\cdot -}$ ) levels of PANC-1 cells were

588 determined by flow cytometry with the fluorescent dye DHE. (B) Quantification of the mean

589 DHE fluorescence levels after each treatment. Data were presented as the mean  $\pm$  standard

590 deviation in triplicate (\*\*P<0.001). Ctrl, Control group with no treatment; Propolis, Propolis

591 group with 0.3% (v/v) propolis; TC-HT, TC-HT group with 10 cycles TC-HT (setting: 46 °C 3

592 min – 37 °C 30 s); Propolis + TC-HT, Propolis + TC-HT group with 0.3% (v/v) propolis and 10

593 cycles TC-HT (setting: 46 °C 3 min – 37 °C 30 s), sequentially; US, US group with 2.25 MHz

594 US (0.3 W/cm<sup>2</sup>) for 30 min; Triple, Triple group with 0.3% (v/v) propolis, 10 cycles TC-HT

595 (setting: 46 °C 3 min – 37 °C 30 s), and 2.25 MHz US (0.3 W/cm<sup>2</sup>) for 30 min, sequentially.

596 **Abbreviations:** US, ultrasound; TC-HT, thermal cycling-hyperthermia; DHE, dihydroethidium.

597

598 **Figure 4** Triple treatment increased apoptosis on PANC-1 cells via mitochondrial dysfunction.

599 **Notes:** (A) Apoptosis after treatment was analyzed via flow cytometry with Annexin V-FITC/PI

600 double staining, and (B) the apoptotic percentage (Q2+Q4) were calculated. (C) MMP level

601 after treatment was analyzed via flow cytometry with DiOC<sub>6</sub>(3) staining, and (D) the percentage  
602 of cells with the loss of MMP (M1) was calculated. Data were presented as the mean ± standard  
603 deviation in triplicate (\*\*\*P<0.001, \*\*P<0.01). Ctrl, Control group with no treatment; Propolis,  
604 Propolis group with 0.3% (v/v) propolis; TC-HT, TC-HT group with 10 cycles TC-HT (setting:  
605 46 °C 3 min – 37 °C 30 s); Propolis + TC-HT, Propolis + TC-HT group with 0.3% (v/v)  
606 propolis and 10 cycles TC-HT (setting: 46 °C 3 min – 37 °C 30 s), sequentially; US, US group  
607 with 2.25 MHz US (0.3 W/cm<sup>2</sup>) for 30 min; Triple, Triple group with 0.3% (v/v) propolis, 10  
608 cycles TC-HT (setting: 46 °C 3 min – 37 °C 30 s), and 2.25 MHz US (0.3 W/cm<sup>2</sup>) for 30 min,  
609 sequentially.

610 **Abbreviations:** US, ultrasound; TC-HT, thermal cycling-hyperthermia; DiOC<sub>6</sub>(3),  
611 3,3'-dihexyloxacarbocyanine iodide.

612

613 **Figure 5** Triple treatment modulated apoptosis via regulating the MAPK family.

614 **Notes:** Representative western blots of the apoptosis-related proteins and the quantification of  
615 (A) the PARP cleavage (ratio of cleaved PARP/full length PARP), the phosphorylation level of  
616 (B) ERK, (C) JNK, and (D) p38. GAPDH was used as loading control. Data were presented as  
617 the mean ± standard deviation in triplicate (\*\*\*P<0.001, \*\*P<0.01, \*P<0.05). Ctrl, Control

618 group with no treatment; Propolis, Propolis group with 0.3% (v/v) propolis; TC-HT, TC-HT  
619 group with 10 cycles TC-HT (setting: 46 °C 3 min – 37 °C 30 s); Propolis + TC-HT, Propolis +  
620 TC-HT group with 0.3% (v/v) propolis and 10 cycles TC-HT (setting: 46 °C 3 min – 37 °C 30  
621 s), sequentially; US, US group with 2.25 MHz US (0.3 W/cm<sup>2</sup>) for 30 min; Triple, Triple group  
622 with 0.3% (v/v) propolis, 10 cycles TC-HT (setting: 46 °C 3 min – 37 °C 30 s), and 2.25 MHz  
623 US (0.3 W/cm<sup>2</sup>) for 30 min, sequentially.

624 **Abbreviations:** US, ultrasound; TC-HT, thermal cycling-hyperthermia.

625

626 **Figure 6** ROS inhibition blocked the cell death and the activation of apoptosis pathways.

627 **Notes:** (A) Cell viabilities of PANC-1 cells and (B) the quantification of PARP cleavage (ratio  
628 of cleaved PARP/full length PARP) after the triple treatment with or without 1h NAC  
629 pretreatment. GAPDH was used as loading control. Data were presented as the mean ± standard  
630 deviation in triplicate (\*\*P<0.001, \*\*P<0.01). Ctrl, Control group with no treatment; Triple,  
631 Triple group with 0.3% (v/v) propolis, 10 cycles TC-HT (setting: 46 °C 3 min – 37 °C 30 s),  
632 and 2.25 MHz US (0.3 W/cm<sup>2</sup>) for 30 min, sequentially. NAC, NAC group with 5 mM NAC;  
633 NAC + Triple, NAC + Triple group with 5 mM NAC prior to the triple treatment.

634 **Abbreviation:** NAC, N-acetyl-cysteine.



635

636 **Figure 7** The method of triple treatment promoted the inhibitory effect of the heat sensitive

637 chemotherapy drug cisplatin.

638 **Notes:** Cell viabilities of PANC-1 cells treated with cisplatin, cisplatin + TC-HT, and the triple

639 treatment of cisplatin + TC-HT + US. Cisplatin concentrations in all treatments were 1  $\mu$ M.

640 Data were presented as the mean  $\pm$  standard deviation in triplicate (\*\*P<0.001). Ctrl, Control

641 group with no treatment; Cisplatin, Cisplatin group with 1  $\mu$ M cisplatin; Cisplatin + TC-HT,

642 Cisplatin + TC-HT group with 1  $\mu$ M cisplatin, 10 cycles TC-HT (setting: 46 °C 3 min – 37 °C

643 30 s), sequentially; Triple, Triple group with 1  $\mu$ M cisplatin, 10 cycles TC-HT (setting: 46 °C 3

644 min – 37 °C 30 s), and 2.25 MHz US (0.3 W/cm<sup>2</sup>) for 30 min, sequentially.

645 **Abbreviation:** TC-HT, thermal cycling-hyperthermia.

646

647

Figure 1

**A**

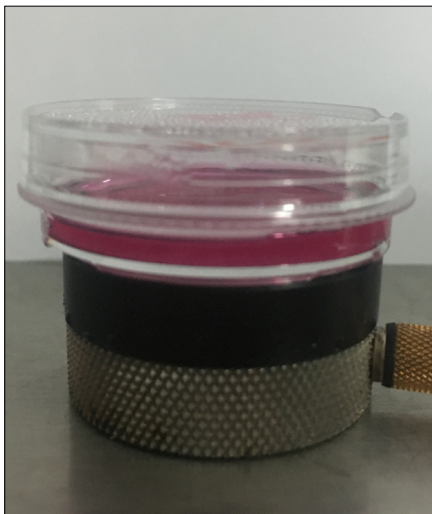

**B**

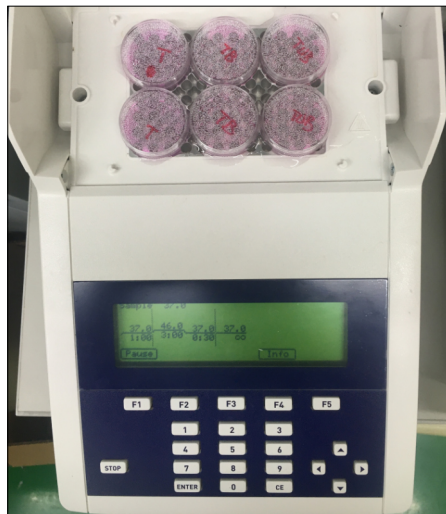

**C**

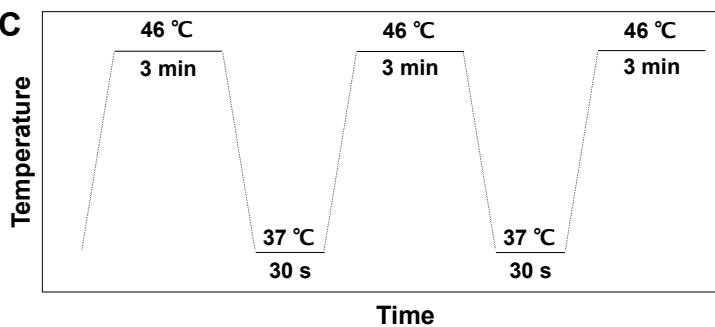

**D**

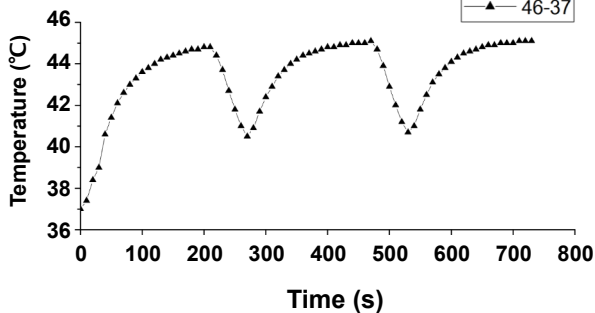

**E**

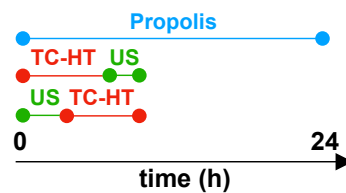

**Figure 2**

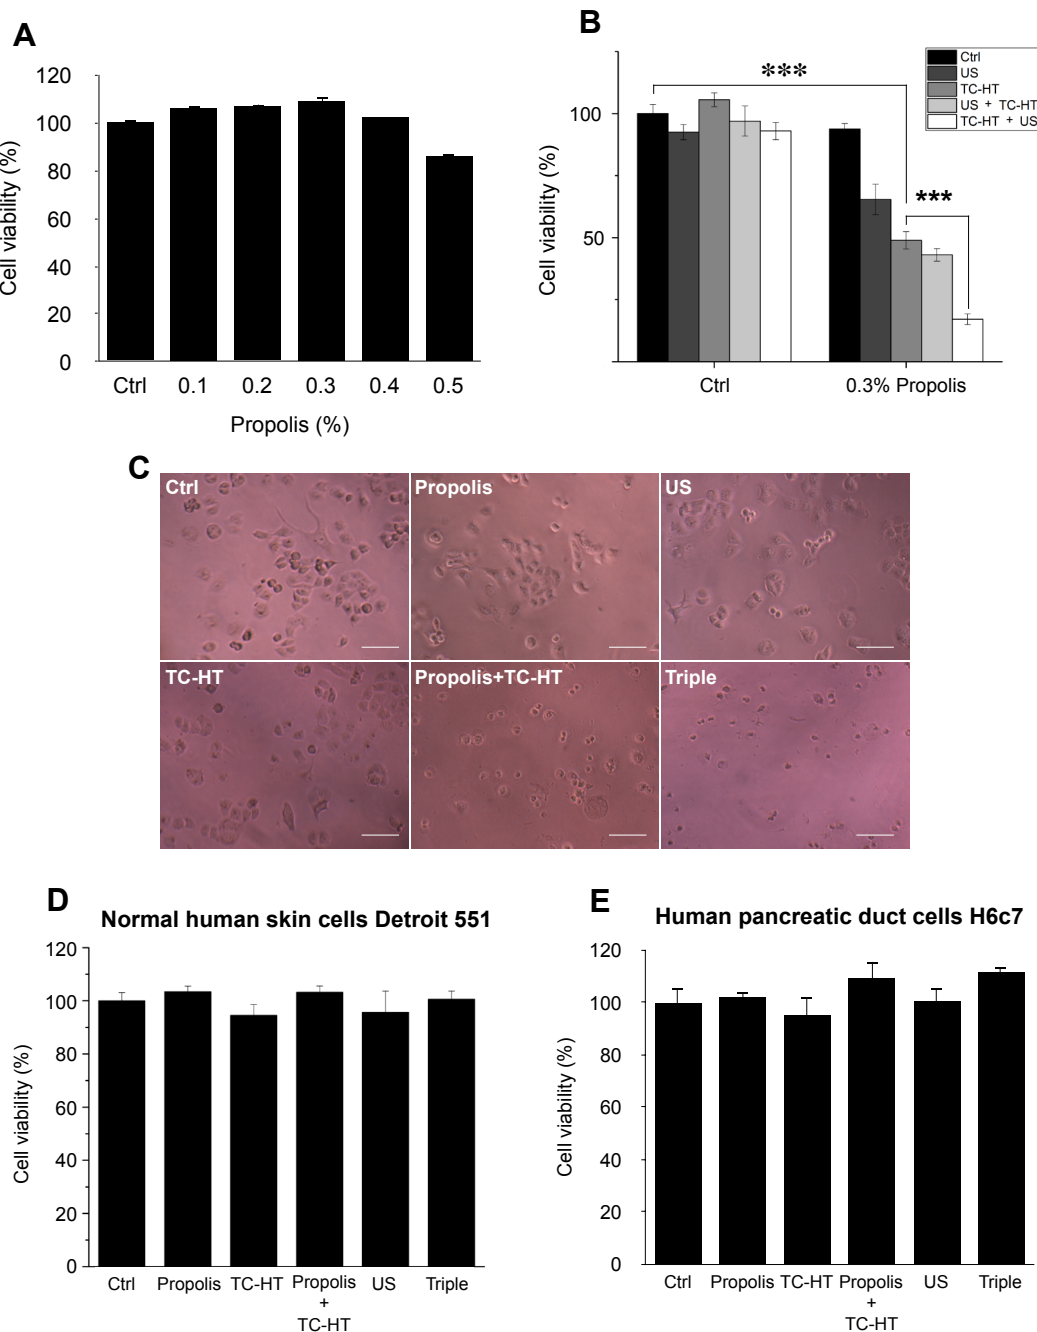

Figure 3

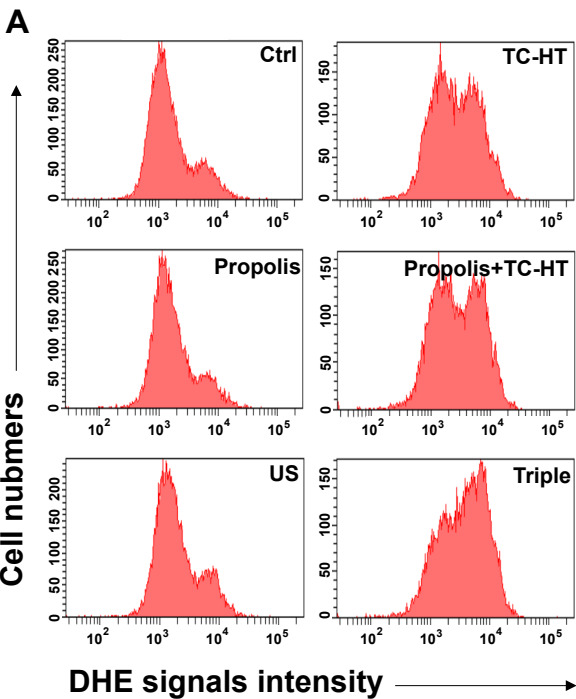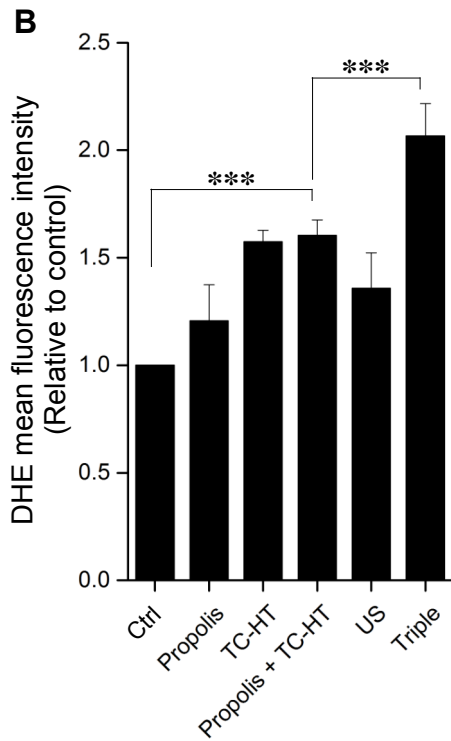

Figure 4

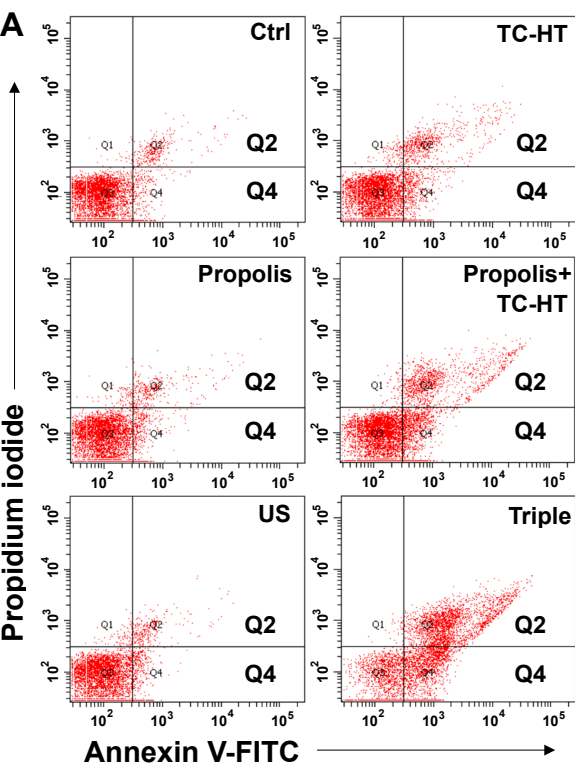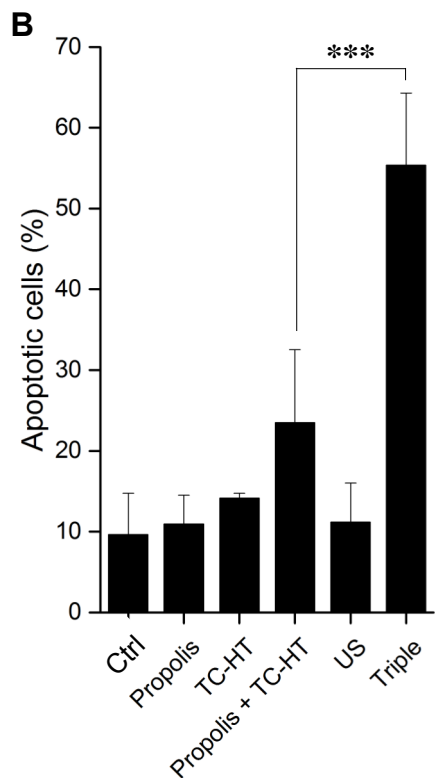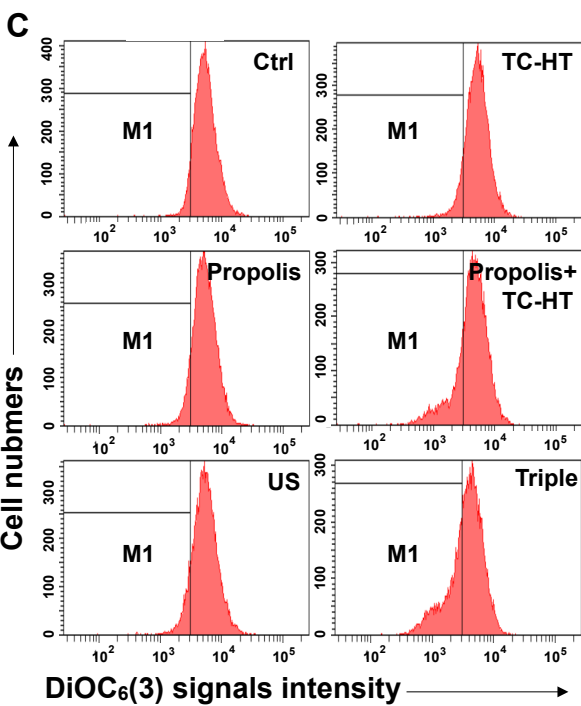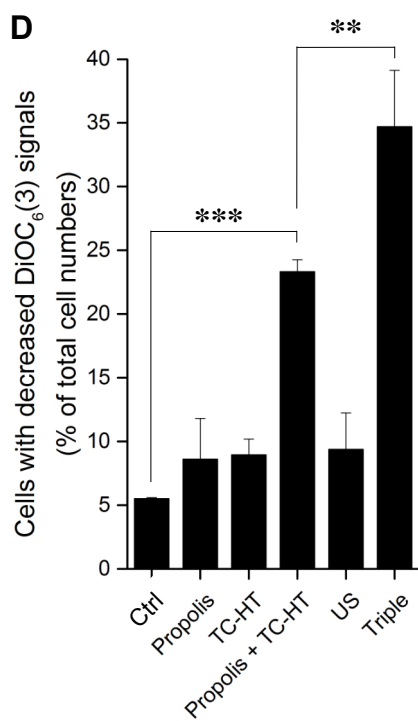

Figure 5

**A**

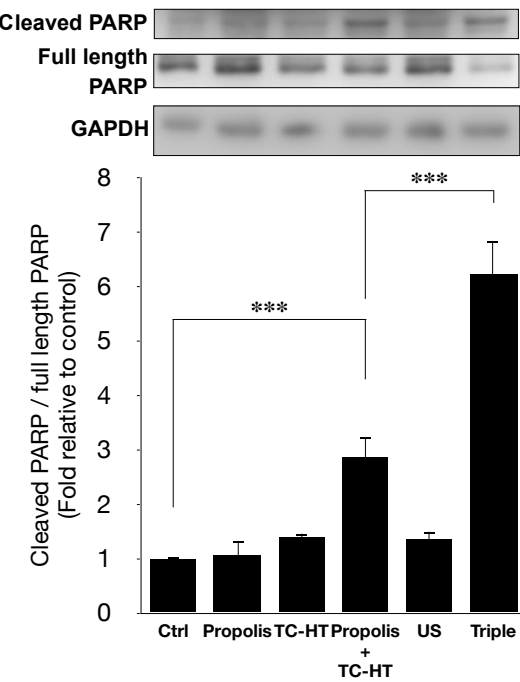

**B**

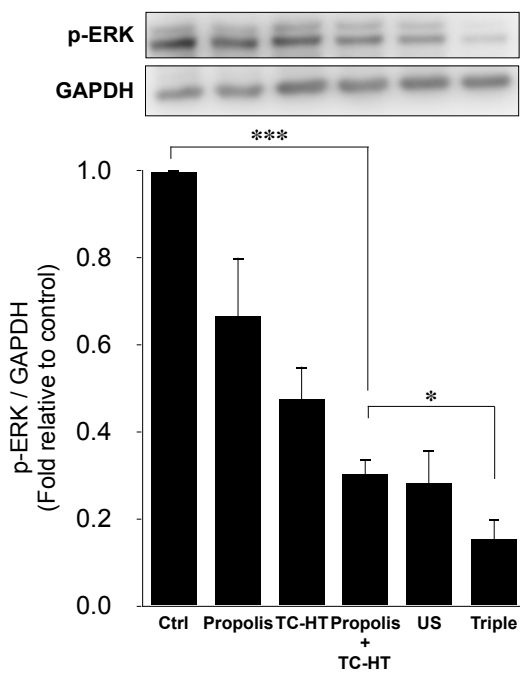

**C**

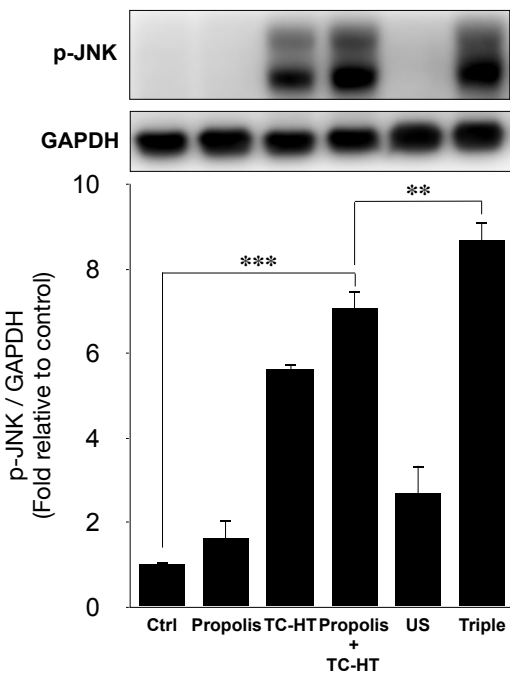

**D**

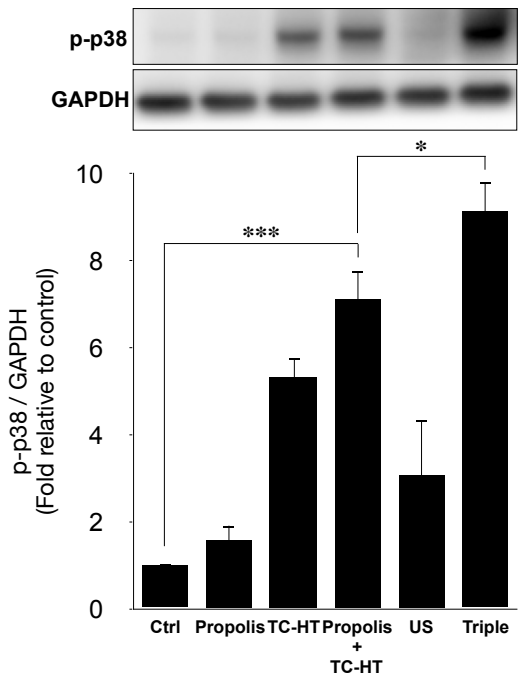

Figure 6

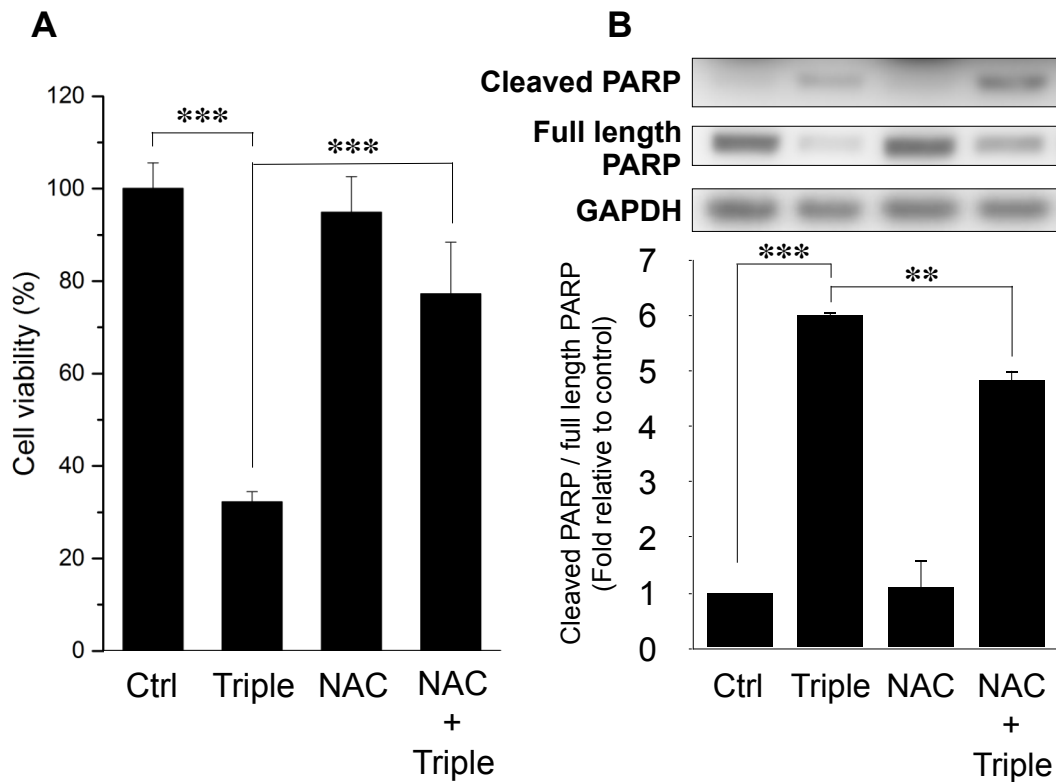

Figure 7

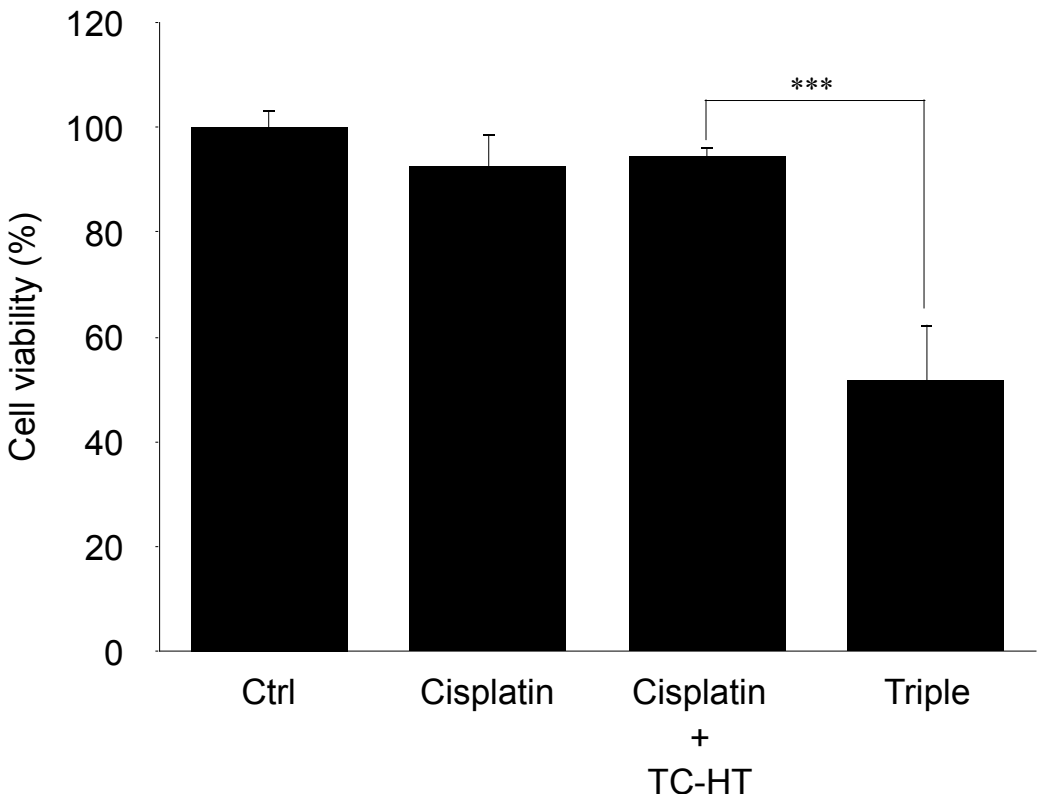

Source: https://www.biorxiv.org/content/10.1101/2021.11.19.469215v2.full.pdf
